# Supplementary material for: Apoptosis-like bacterial death modulated by photoactive hyperthermia nanomaterials and enhanced wound disinfection application
Source: Royal Society of Chemistry journal article supplement (doi:10.1039/d1nr02881b), 2021-01-01
Supplement: d1nr02881b1.pdf [file d1nr02881b1.pdf]

## Supporting information

### **Apoptosis-like Bacterial Death Modulated by Photoactive Hyperthermia Nanomaterials and Enhanced Wound Disinfection Application**

Li Qiang,<sup>#</sup> Hangshuai Jin,<sup>#</sup> Yonghai Feng,<sup>\*</sup> Rongrong Wu, Yongxiu Song and Lei Liu<sup>\*</sup>

Institute for Advanced Materials, School of Materials Science and Engineering, Jiangsu University,  
Zhenjiang, Jiangsu, 212013, China

**Table. S1.** Concentration of extracellular  $\text{Ca}^{2+}$  and  $\text{Mg}^{2+}$  at different PTT temperature

| Extracellular $\text{Ca}^{2+}/\text{Mg}^{2+}$ in <i>E. coli</i> | Temperatures ( $^{\circ}\text{C}$ ) |                 |                  |                  |
|-----------------------------------------------------------------|-------------------------------------|-----------------|------------------|------------------|
|                                                                 | 30                                  | 45              | 55               | 61               |
| $\text{Mg}^{2+}$ ( $\mu\text{g L}^{-1}$ )                       | $66.7 \pm 0.65$                     | $82.3 \pm 1.65$ | $189.0 \pm 1.50$ | $193.4 \pm 1.30$ |
| $\text{Ca}^{2+}$ concentration                                  | $77.7 \pm 1.15$                     | $97.9 \pm 1.45$ | $183.1 \pm 1.53$ | $191.7 \pm 1.16$ |

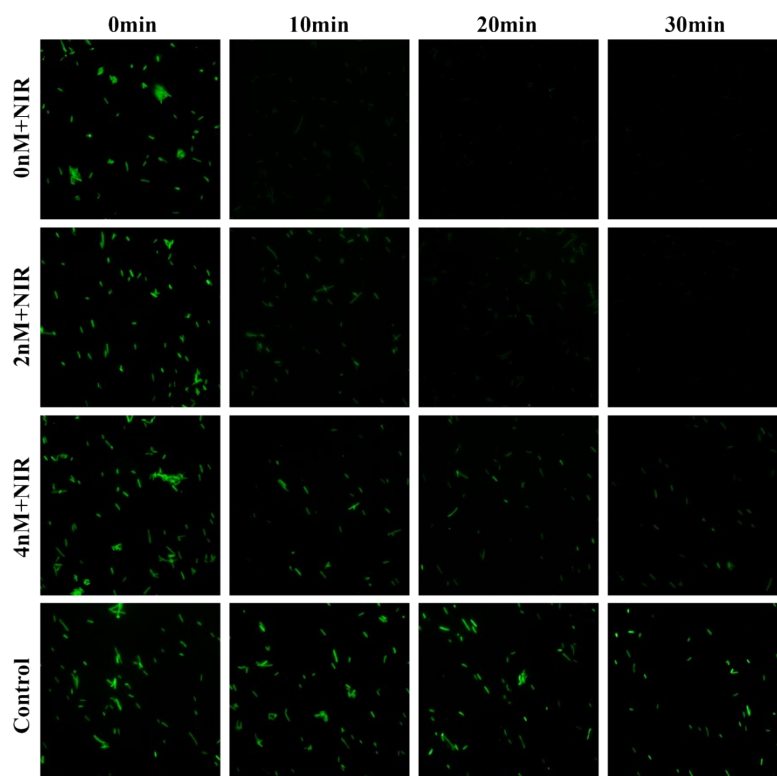

**Figure S1.** Changes in intracellular calcium homogeneity of bacteria treated with Amlopin at different concentrations of 0, 2, and 4 nM, and exposed to NIR radiation over time. The PTT conditions are of Au concentration =  $30 \mu\text{g mL}^{-1}$ , *E. coli* concentration =  $10^7 \text{ CFU mL}^{-1}$ , Total solution volume =  $400 \mu\text{L}$ , 808 nm NIR laser power density =  $2 \text{ W cm}^{-2}$ ,  $T_{\text{max}} = 50 ^{\circ}\text{C}$ , irradiation time = 0-30 min.

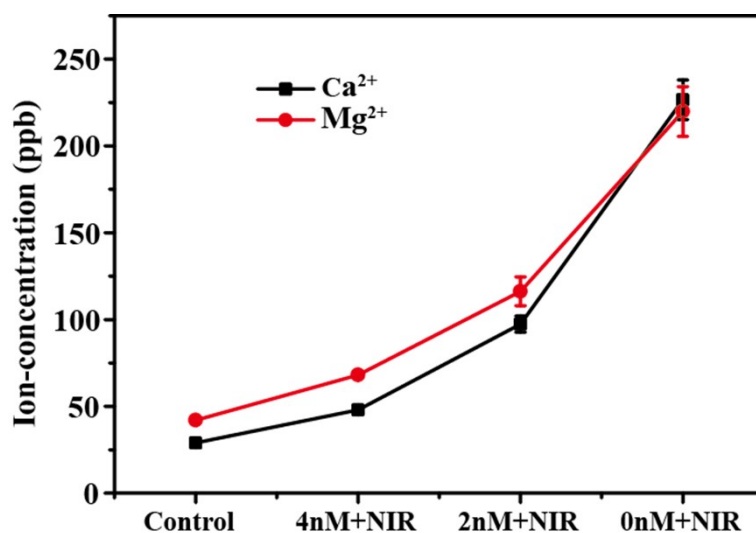

**Figure S2.** Corresponding extracellular calcium and magnesium ions concentration of bacteria treated with different Amlopin concentrations (0, 2, 4 nM) under PTT for 10 min. The PTT conditions are of Au concentration =  $30 \mu\text{g mL}^{-1}$ , *E. coli* concentration =  $10^7 \text{ CFU mL}^{-1}$ , Total solution volume =  $400 \mu\text{L}$ , 808 nm NIR laser power density =  $2 \text{ W cm}^{-2}$ ,  $T_{\text{max}} = 50^\circ\text{C}$ .

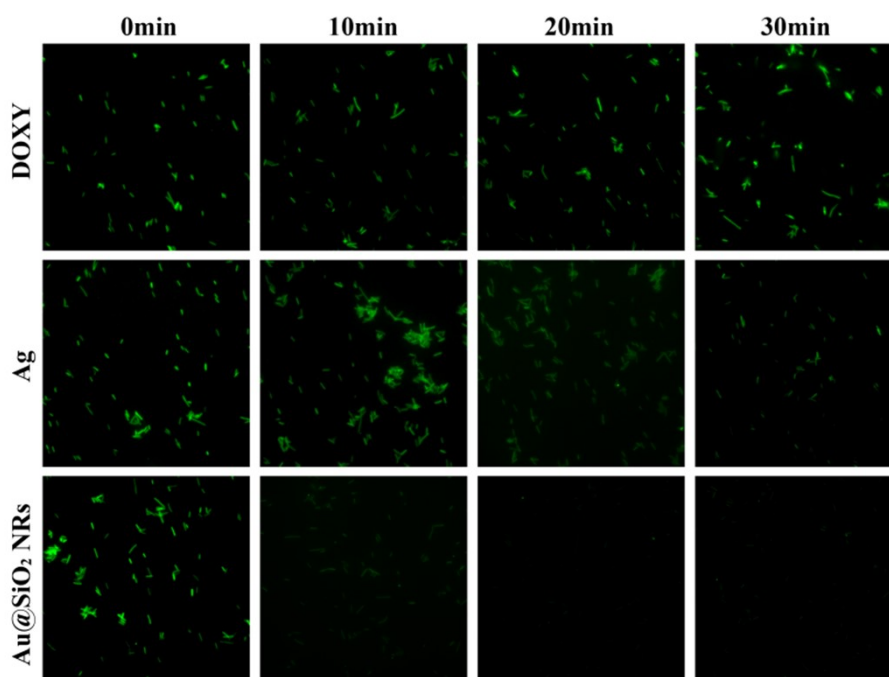

**Figure S3.** Changes in intracellular calcium homogeneity of bacteria treated with DOXY ( $15 \mu\text{g mL}^{-1}$ ), Ag ( $3 \mu\text{g mL}^{-1}$ ), and Au@SiO<sub>2</sub> NRs ( $30 \mu\text{g mL}^{-1}$ ) exposed to NIR radiation ( $2 \text{ W cm}^{-2}$ ) over time.

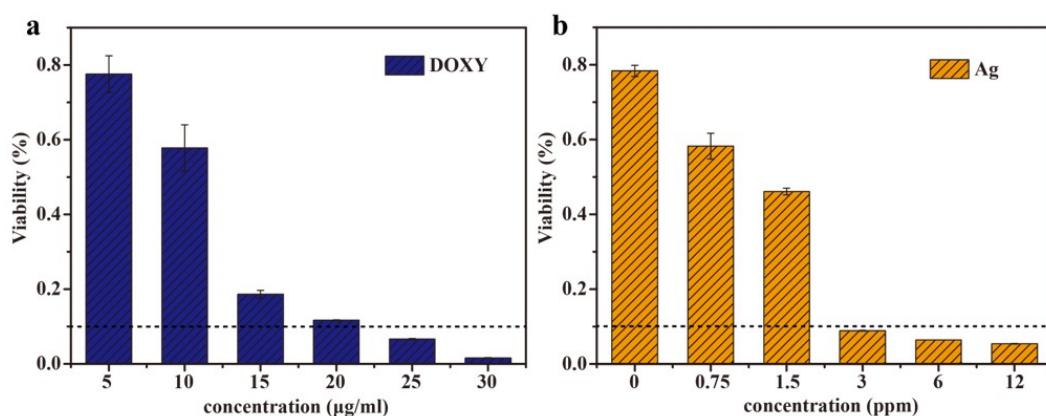

**Figure S4.** Antibacterial effect of different concentrations of DOXY (a) and Ag (b), which were incubated with  $10^7$  CFU mL<sup>-1</sup> *E. coli* for 1 h.

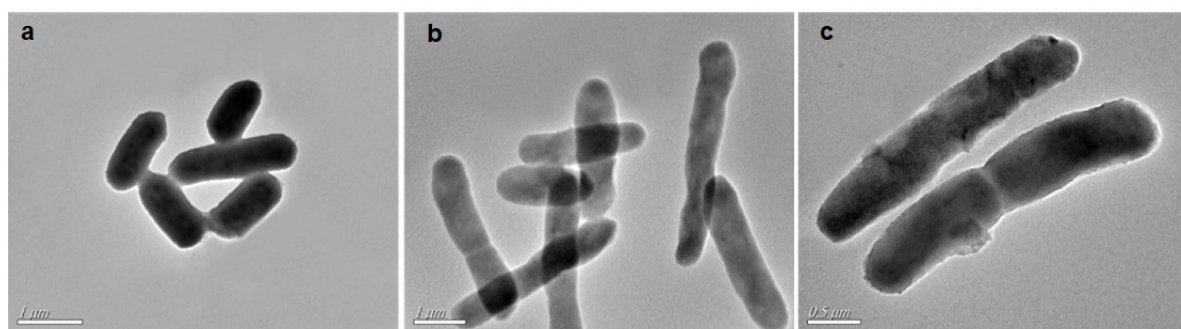

**Figure S5.** TEM images of *E. coli* (a), PTT treated *E. coli* at 55 °C (b) and 61 °C (c), respectively. PTT conditions: Au concentration, 30 μg mL<sup>-1</sup>; *E. coli* concentration,  $10^7$  CFU mL<sup>-1</sup>; Total solution volume, 400 μL; 808 nm NIR laser power density, 3 W cm<sup>-2</sup>. Note: the PTT will stop immediately when reaching the desired temperature.

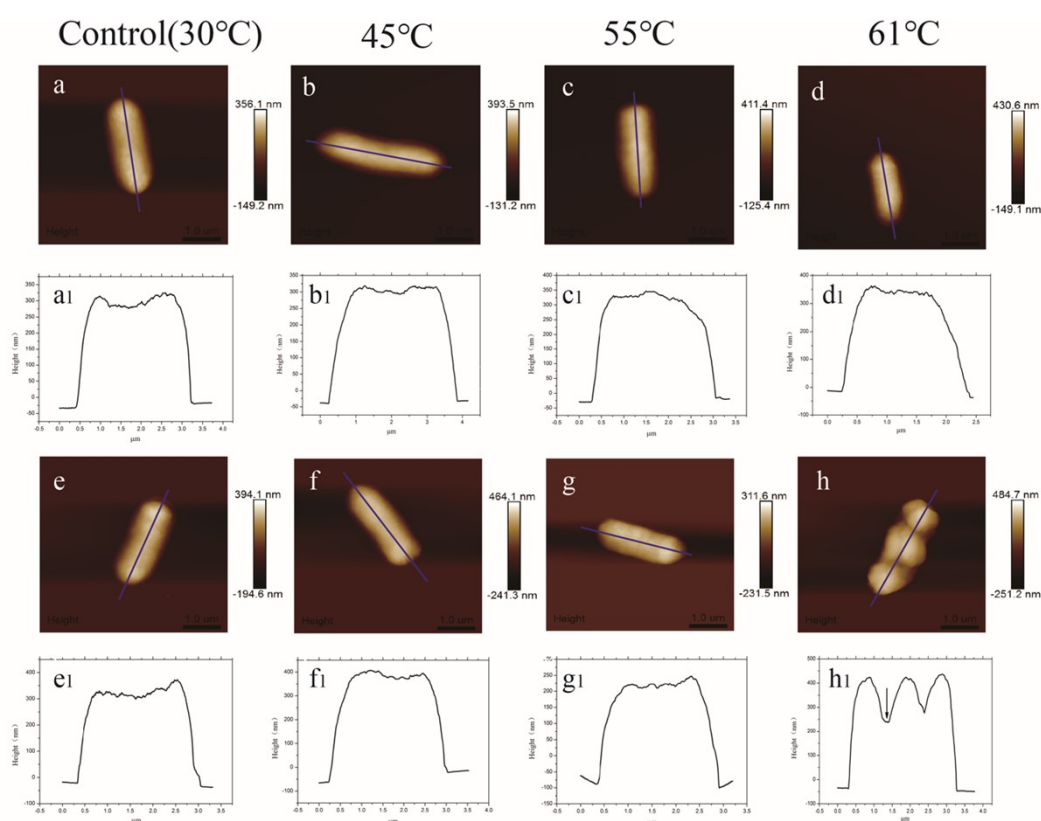

**Figure S6.** AFM tapping mode images of Gram negative *E. coli* in air. (a) AFM height image of individual healthy *E. coli* which mixed with PBS. (e) Height image of individual healthy *E. coli* mixed with Au@SiO<sub>2</sub> NRs. (b-d) Height images of *E. coli* treated by water-bath heating, when it reached 45, 55, 61 °C, respectively. (a<sub>1</sub>-d<sub>1</sub>) Cross-section taken along the blue line in height images. (f-h) Height images of *E. coli* treated by Au@SiO<sub>2</sub> NRs exposed to NIR laser irradiation (3 W cm<sup>-2</sup>), when temperatures are reached to 45, 55, 61 °C respectively. (e<sub>1</sub>-h<sub>1</sub>) Cross-section taken along the blue line in height images. **Note:** All scan range are 5 μm<sup>2</sup>.

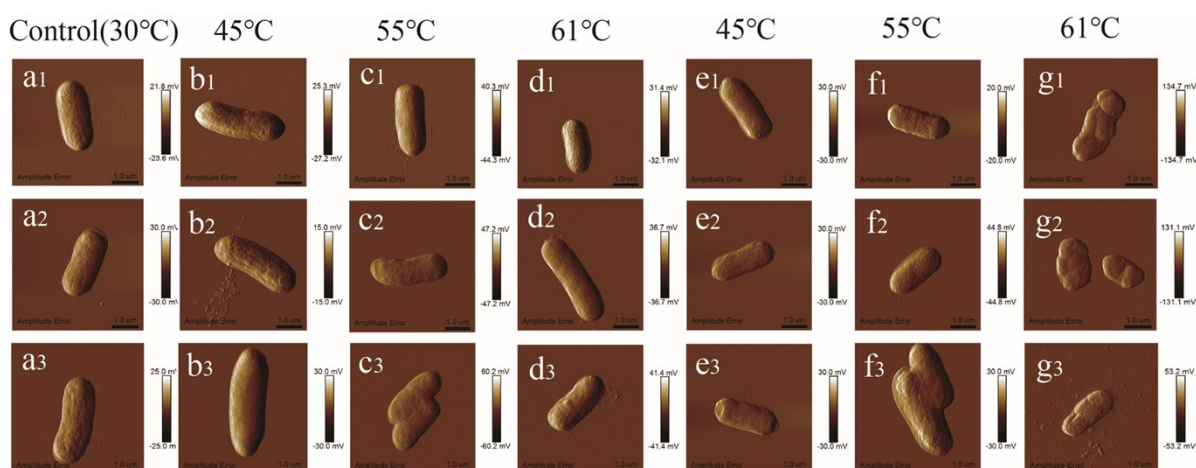

**Figure S7.** AFM tapping mode images of Gram negative *E. coli* in air. (a1, a2, a3) control, i.e., the

amplitude images of untreated *E. coli* at 30°C. (b1, b2, b3; c1, c2, c3; d1, d2, d3) the amplitude images of *E. coli* which are treated by water-bath heating with temperature of 45 °C, 55 °C, 61 °C, respectively. (e1, e2, e3; f1, f2, f3; g1, g2, g3) the amplitude images of *E. coli* treated by Au@SiO<sub>2</sub> NRs exposed to NIR laser irradiation (3 W cm<sup>-2</sup>). **Note:** All scan range are 5 μm<sup>2</sup>.

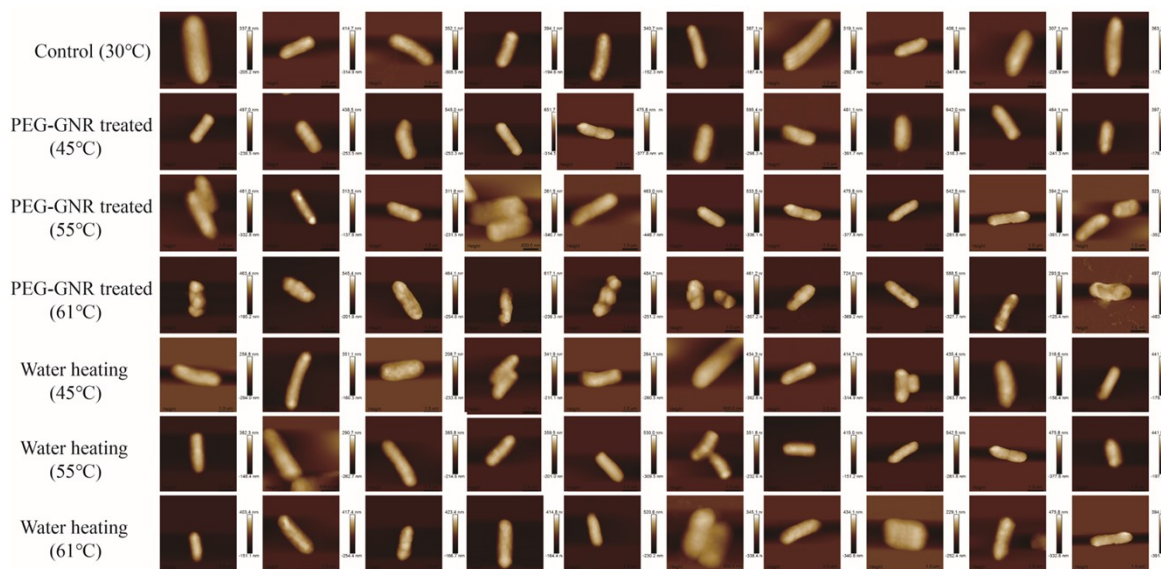

**Figure S8.** AFM tapping mode images of Gram negative *E. coli* in air. AFM height images at every temperature.

**Table S2.** W: water bath heating; A: Au@SiO<sub>2</sub> NRs treated under NIR. Average surface roughness of 80×300 nm<sup>2</sup> areas on 10 cells at each temperature.

| Average surface roughness (nm) |      |      |      |      |      |       |      |      |      |      |         |
|--------------------------------|------|------|------|------|------|-------|------|------|------|------|---------|
| Bacteria                       | 1    | 2    | 3    | 4    | 5    | 6     | 7    | 8    | 9    | 10   | Average |
| Healthy                        | 8.88 | 7.58 | 8.35 | 9.51 | 8.90 | 11.2  | 10.9 | 10.7 | 9.60 | 9.61 | 9.522   |
| 45 (W)                         | 11.4 | 9.97 | 10.0 | 9.19 | 8.38 | 9.61  | 8.89 | 9.47 | 9.10 | 9.49 | 9.551   |
| 55 (W)                         | 9.92 | 10.8 | 9.82 | 10.2 | 9.81 | 11.47 | 10.4 | 9.79 | 9.09 | 10.0 | 10.12   |
| 61 (W)                         | 11.4 | 10.9 | 10.0 | 10.9 | 10.2 | 9.80  | 10.6 | 11.0 | 10.9 | 10.3 | 10.61   |
| 45 (A)                         | 12.0 | 11.9 | 11.1 | 9.87 | 10.3 | 10.30 | 11.1 | 11.9 | 11.9 | 11.8 | 11.23   |
| 55 (A)                         | 13.8 | 15.3 | 17.7 | 13.0 | 11.7 | 15.51 | 14.9 | 15.4 | 13.4 | 15.1 | 14.58   |
| 61 (A)                         | 17.2 | 26.9 | 20.5 | 21.7 | 27.2 | 24.21 | 19.9 | 26.0 | 19.5 | 16.6 | 23.15   |

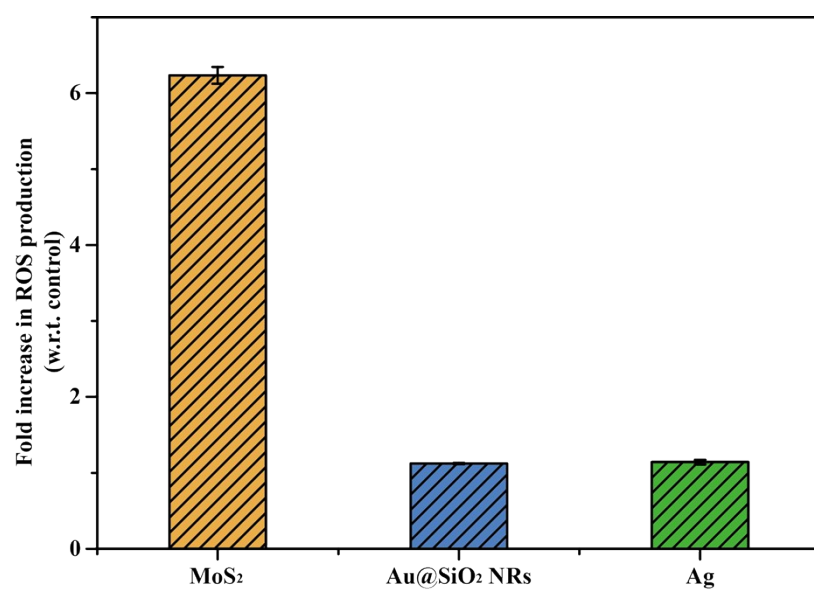

**Figure S9.** Compared with MoS<sub>2</sub>, Au@SiO<sub>2</sub> NRs and Ag produce almost no ROS.
